# Supplementary material for: Significant differences of monooxotungsten(iv) and dioxotungsten(vi) benzenedithiolates containing two intramolecular NH⋯S hydrogen bonds from molybdenum analogues
Source: Royal Society of Chemistry journal article supplement (doi:10.1039/c5dt03278d), 2015-01-01
Supplement: c5dt03278d1.pdf [file c5dt03278d1.pdf]

## **Supplementary Information:**

### **Significant differences of monooxotungsten(IV) and dioxotungsten(VI) benzenedithiolates containing two intramolecular NH···S hydrogen bonds from molybdenum analogues**

Taka-aki Okamura,\* Yui Omi, Manami Fujii, Miki Tatsumi and Kiyotaka Onitsuka

Department of Macromolecular Science, Graduate School of Science, Osaka University, Toyonaka,  
Osaka 560-0043, Japan

E-mail: tokamura@chem.sci.osaka-u.ac.jp

**Table S1** Crystallographic data for (NEt<sub>4</sub>)<sub>2</sub>[W<sup>IV</sup>O(1,2-S<sub>2</sub>-3-*t*-BuNHCOC<sub>6</sub>H<sub>3</sub>)<sub>2</sub>] (**1-W**), (NEt<sub>4</sub>)<sub>2</sub>[W<sup>IV</sup>(1,2-S<sub>2</sub>-3-*t*-BuNHCOC<sub>6</sub>H<sub>3</sub>)<sub>3</sub>]·H<sub>2</sub>O (**3·H<sub>2</sub>O**), and (NEt<sub>4</sub>)<sub>2</sub>[{W<sup>VI</sup>O<sub>2</sub>(1,2-S<sub>2</sub>-3-*t*-BuNHCOC<sub>6</sub>H<sub>3</sub>)<sub>2</sub>(μ-O)]·2(Et<sub>2</sub>O) (**4·2(Et<sub>2</sub>O)**)

|                                                                                                         | <b>1-W</b>                                                                     | <b>3·H<sub>2</sub>O</b>                                                        | <b>4·2(Et<sub>2</sub>O)</b>                                                                 |
|---------------------------------------------------------------------------------------------------------|--------------------------------------------------------------------------------|--------------------------------------------------------------------------------|---------------------------------------------------------------------------------------------|
| empirical formula                                                                                       | C <sub>38</sub> H <sub>66</sub> N <sub>4</sub> O <sub>3</sub> S <sub>4</sub> W | C <sub>49</sub> H <sub>81</sub> N <sub>5</sub> O <sub>4</sub> S <sub>6</sub> W | C <sub>46</sub> H <sub>86</sub> N <sub>4</sub> O <sub>9</sub> S <sub>4</sub> W <sub>2</sub> |
| formula weight                                                                                          | 939.04                                                                         | 1180.39                                                                        | 1335.12                                                                                     |
| color                                                                                                   | orange                                                                         | red                                                                            | yellow                                                                                      |
| crystal system                                                                                          | orthorhombic                                                                   | orthorhombic                                                                   | monoclinic                                                                                  |
| <i>a</i> , Å                                                                                            | 8.865(2)                                                                       | 21.3866(5)                                                                     | 17.9606(14)                                                                                 |
| <i>b</i> , Å                                                                                            | 16.289(3)                                                                      | 18.6641(4)                                                                     | 8.7047(8)                                                                                   |
| <i>c</i> , Å                                                                                            | 29.929(7)                                                                      | 29.515(2)                                                                      | 18.3212(14)                                                                                 |
| <i>β</i> , deg                                                                                          | 90                                                                             | 90                                                                             | 91.438(5)                                                                                   |
| <i>V</i> , Å <sup>3</sup>                                                                               | 4321.8(16)                                                                     | 11781.4(9)                                                                     | 2863.5(4)                                                                                   |
| space group                                                                                             | <i>P</i> 2 <sub>1</sub> 2 <sub>1</sub> 2 <sub>1</sub>                          | <i>Pna</i> 2 <sub>1</sub>                                                      | <i>P</i> 2 <sub>1</sub> / <i>c</i>                                                          |
| <i>Z</i>                                                                                                | 4                                                                              | 8                                                                              | 2                                                                                           |
| <i>D</i> <sub>calc</sub> , g/cm <sup>3</sup>                                                            | 1.443                                                                          | 1.331                                                                          | 1.548                                                                                       |
| <i>F</i> (000)                                                                                          | 1936                                                                           | 4896                                                                           | 1348                                                                                        |
| <i>μ</i> (MoKα), mm <sup>-1</sup>                                                                       | 2.905                                                                          | 2.216                                                                          | 4.210                                                                                       |
| Scan type                                                                                               | ω                                                                              | ω                                                                              | ω                                                                                           |
| 2θ <sub>max</sub> , deg                                                                                 | 50                                                                             | 50                                                                             | 55                                                                                          |
| No. of Reflections unique                                                                               | 7323                                                                           | 20684                                                                          | 6532                                                                                        |
| No. Variables                                                                                           | 454                                                                            | 1172                                                                           | 295                                                                                         |
| residuals; <i>R</i> 1 <sup><i>a</i></sup> ( <i>I</i> > 2σ( <i>I</i> )), <i>wR</i> 2 <sup><i>b</i></sup> | 0.0685, 0.1540                                                                 | 0.0781, 0.1503                                                                 | 0.0293, 0.0437                                                                              |
| (all data)                                                                                              |                                                                                |                                                                                |                                                                                             |
| GOF                                                                                                     | 1.199                                                                          | 1.113                                                                          | 0.858                                                                                       |

$${}^a R1 = \sum ||F_o| - |F_c|| / \sum |F_o|. \quad {}^b wR2 = \{ \sum [w(F_o^2 - F_c^2)^2] / \sum [w(F_o^2)^2] \}^{1/2}$$

**Table S2** Raman bands of monooxo-tungsten and molybdenum complexes

| Complex                                                                                               | <i>ν</i> (M=O)/cm <sup>-1</sup> | References |
|-------------------------------------------------------------------------------------------------------|---------------------------------|------------|
| (NEt <sub>4</sub> )[W <sup>V</sup> O(SC <sub>6</sub> F <sub>5</sub> ) <sub>4</sub> ]                  | 980                             | This work  |
| (NEt <sub>4</sub> )[W <sup>V</sup> O(SPh) <sub>4</sub> ]                                              | 943 <sup><i>a</i></sup>         | 12         |
| (NEt <sub>4</sub> )[Mo <sup>V</sup> O(SC <sub>6</sub> F <sub>5</sub> ) <sub>4</sub> ]                 | 982 <sup><i>a</i></sup>         | 30         |
| (NEt <sub>4</sub> )[Mo <sup>V</sup> O(SPh) <sub>4</sub> ]                                             | 936                             | 38         |
| (NEt <sub>4</sub> ) <sub>2</sub> [W <sup>IV</sup> O(SC <sub>6</sub> F <sub>5</sub> ) <sub>4</sub> ]   | 949                             | This work  |
| (HNEt <sub>3</sub> ) <sub>2</sub> [Mo <sup>IV</sup> O(SC <sub>6</sub> F <sub>5</sub> ) <sub>4</sub> ] | 927 <sup><i>a</i></sup>         | 30         |

<sup>*a*</sup>IR spectra.

**Table S3** Chemical shifts and proposed structures of **LH<sub>2</sub>** and the deprotonated forms in acetonitrile-*d*<sub>3</sub>

|                                                                                                                                   | 4-H (dd) | 6-H (dd) | 5-H (t) | NH (br s) | SH (br s) | <i>t</i> -Bu (s) |
|-----------------------------------------------------------------------------------------------------------------------------------|----------|----------|---------|-----------|-----------|------------------|
| 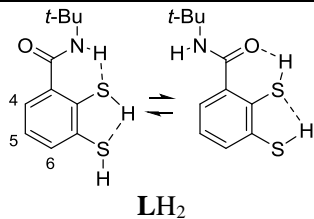 <p><b>LH<sub>2</sub></b></p>                    | 7.42     | 7.23     | 7.05    | 6.85      | 5.00      | 1.41             |
|  <p><b>(NEt<sub>4</sub>)[LH]</b></p>             | 7.72     | 7.33     | 6.57    | 11.78     | 9.01      | 1.43             |
|  <p><b>(NEt<sub>4</sub>)<sub>2</sub>[L]</b></p> | 7.78     | 7.04     | 6.58    | 12.21     |           | 1.45             |

**Table S4** Contributions of NH...S hydrogen bonds to W and Mo complexes

|            |                      |                                         | W                     | Mo <sup>e</sup>       |
|------------|----------------------|-----------------------------------------|-----------------------|-----------------------|
| <b>1-M</b> | X-ray                | $\Delta(M=O)^a/\text{\AA}$              | -0.012(9)             | -0.001(6)             |
|            |                      | $\Delta(M-S)^a/\text{\AA}$              | -0.028(4) — -0.001(4) | -0.040(2) — -0.003(2) |
|            |                      |                                         | (mean -0.012(4))      | (mean -0.019(4))      |
|            | IR                   | $\Delta\nu(\text{NH})^b/\text{cm}^{-1}$ | -191                  | -198                  |
|            |                      | $\Delta\nu(M=O)^a/\text{cm}^{-1}$       | +15                   | +13                   |
| CV         | $\Delta E_{1/2}^a/V$ | +0.15                                   | +0.12                 |                       |
| <b>2-M</b> | IR                   | $\Delta\nu(\text{NH})^d/\text{cm}^{-1}$ | -206                  | -209                  |
|            | Raman                | $\Delta\nu_s(M=O)^c/\text{cm}^{-1}$     | +9                    | +13                   |
|            |                      | $\Delta\nu_{as}(M=O)^c/\text{cm}^{-1}$  | +13                   | +11                   |

<sup>a</sup>Difference of the values between **1-M** and (NEt<sub>4</sub>)<sub>2</sub>[M<sup>IV</sup>O(bdt)] (**5-M**). (W=O, 1.727(2) Å; W-S, 2.372(4) Å for (NEt<sub>4</sub>)<sub>2</sub>[W<sup>IV</sup>O(bdt)<sub>2</sub>] (**5-W**);<sup>14</sup> Mo=O, 1.699(6) Å; Mo-S, 2.388(2) Å for (NEt<sub>4</sub>)<sub>2</sub>[Mo<sup>IV</sup>O(bdt)<sub>2</sub>] (**5-Mo**).<sup>50</sup> <sup>b</sup>See Table 3. <sup>c</sup>Difference of the values between **2-M** and (NEt<sub>4</sub>)<sub>2</sub>[M<sup>VI</sup>O<sub>2</sub>(bdt)<sub>2</sub>] (**6-M**). <sup>d</sup>See Table 4. <sup>e</sup>Ref. 29.

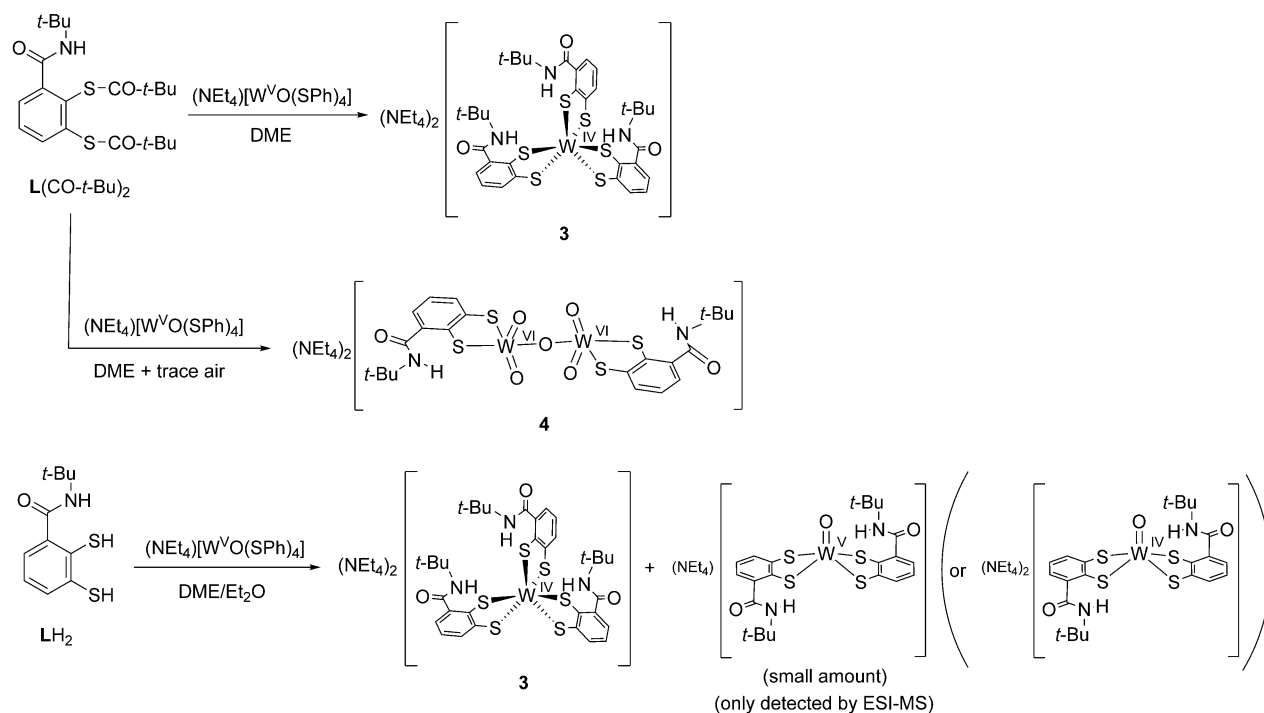

**Scheme S1** Reaction of  $(\text{NEt}_4)[\text{W}^{\text{V}}\text{O}(\text{SPh})_4]$  with  $\text{LH}_2$  or  $\text{L}(\text{CO-}t\text{-Bu})_2$  according to the molybdenum analogue.

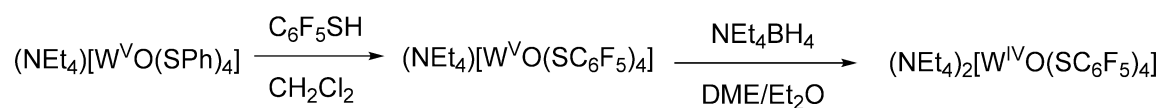

**Scheme S2** Preparation of  $(\text{NEt}_4)_2[\text{W}^{\text{IV}}\text{O}(\text{SC}_6\text{F}_5)_4]$ .

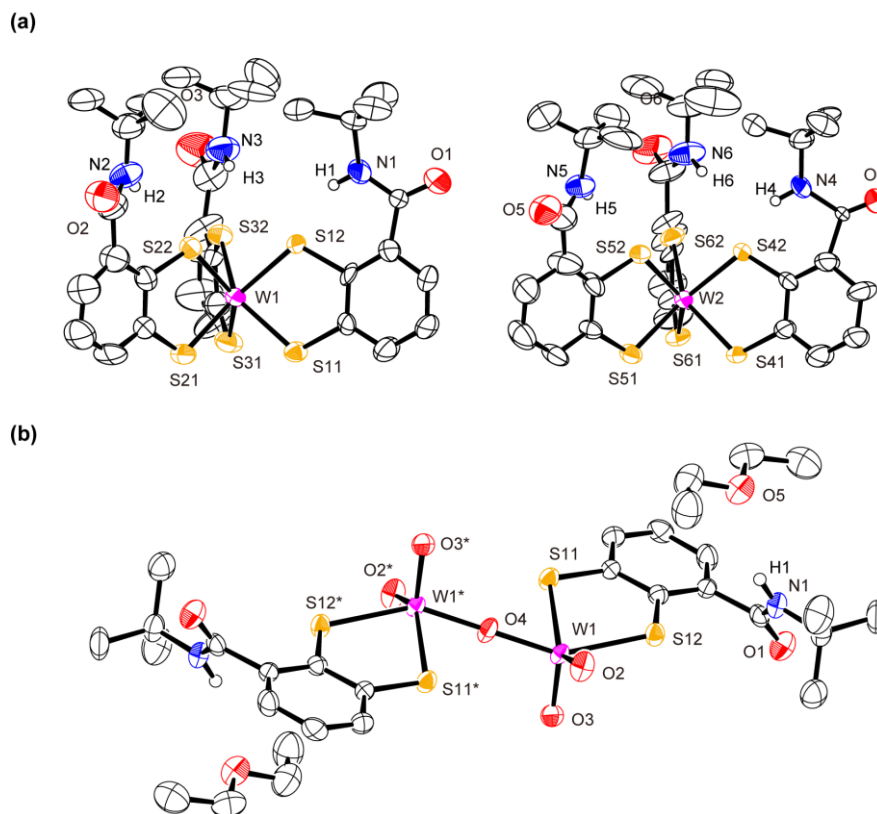

**Fig. S1** Molecular structures (anion parts) of (a)  $(\text{NEt}_4)_2[\text{W}^{\text{IV}}(1,2\text{-S}_2\text{-3-}t\text{-BuNHCOC}_6\text{H}_3)_3]$  (**3**) and (b)  $(\text{NEt}_4)_2\{[\text{W}^{\text{VI}}\text{O}_2(1,2\text{-S}_2\text{-3-}t\text{-BuNHCOC}_6\text{H}_3)]_2(\mu\text{-O})\}$  (**4**) in the crystal. Two molecules of **3** were found in the asymmetric unit.

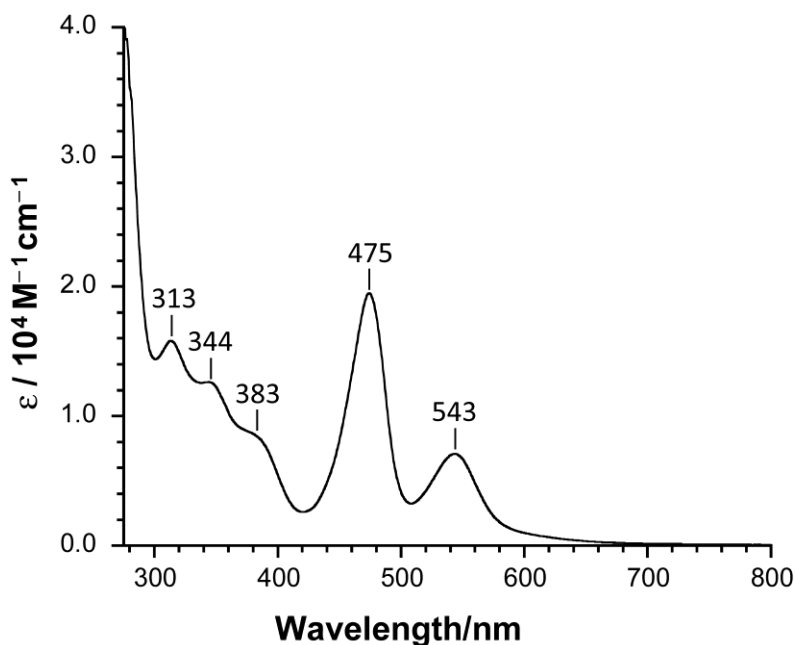

**Fig. S2** UV-vis spectrum of  $(\text{NEt}_4)_2[\text{W}^{\text{IV}}(1,2\text{-S}_2\text{-3-}t\text{-BuNHCOC}_6\text{H}_3)_3]$  (**3**) in DMF.

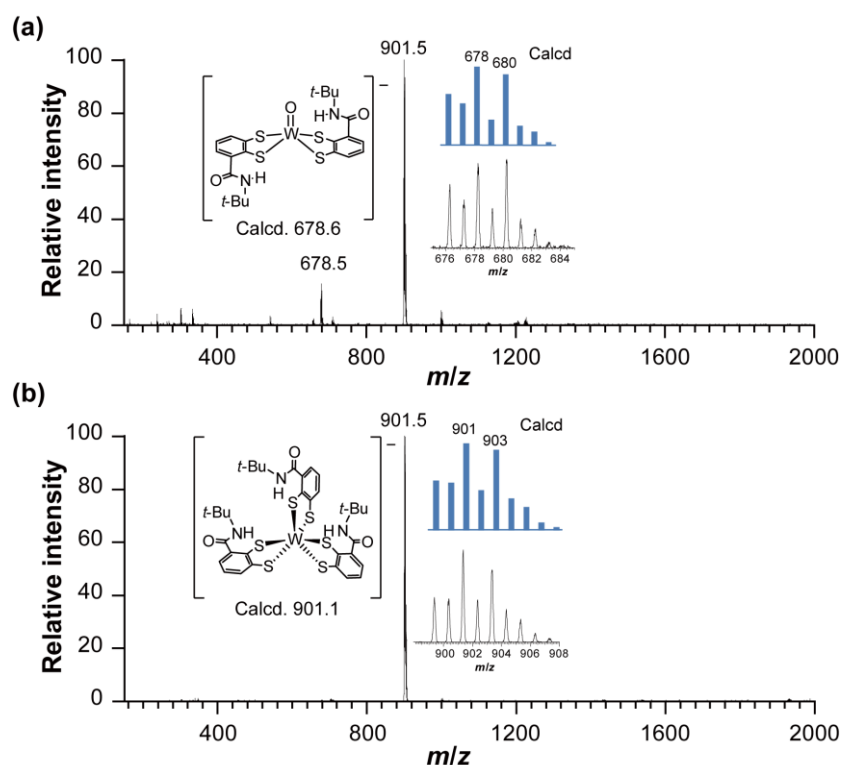

**Fig. S3** ESI-MS spectra of (a) the products in DME/Et<sub>2</sub>O shown in Scheme S1, where the main peak was (NEt<sub>4</sub>)<sub>2</sub>[W<sup>IV</sup>(1,2-S<sub>2</sub>-3-*t*-BuNHCOC<sub>6</sub>H<sub>3</sub>)<sub>3</sub>] (**3**) and a small amount of (NEt<sub>4</sub>)[W<sup>VO</sup>O(1,2-S<sub>2</sub>-3-*t*-BuNHCOC<sub>6</sub>H<sub>3</sub>)<sub>2</sub>] was found, and (b) pure **3**. The enlarged spectra were obtained in the zoom scan mode, accompanying simulated isotope patterns.

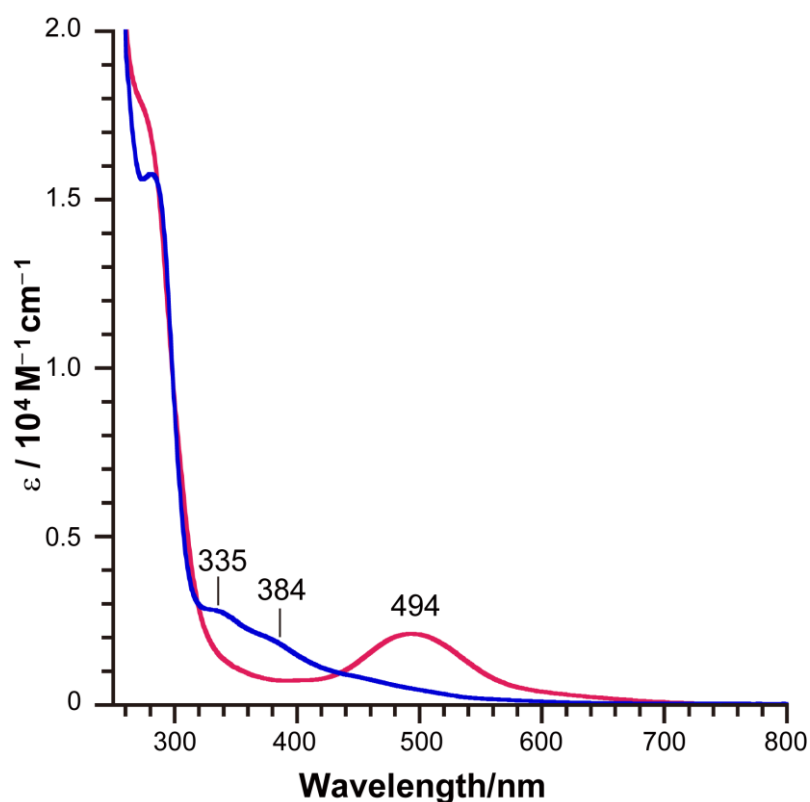

**Fig. S4** UV-vis spectra of (NEt<sub>4</sub>)[W<sup>VO</sup>O(SC<sub>6</sub>F<sub>5</sub>)<sub>4</sub>] (red line) in acetonitrile and (NEt<sub>4</sub>)<sub>2</sub>[W<sup>IV</sup>O(SC<sub>6</sub>F<sub>5</sub>)<sub>4</sub>] (blue line) in DMF.

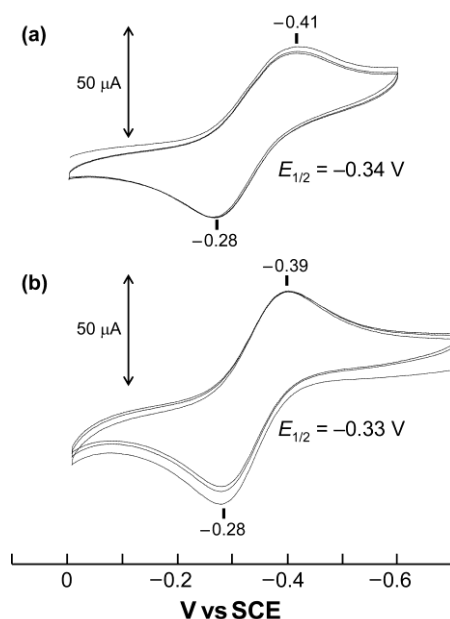

**Fig. S5** Cyclic voltammograms of (a)  $(\text{NE}_4)[\text{W}^{\text{V}}\text{O}(\text{SC}_6\text{F}_5)_4]$  and (b)  $(\text{NE}_4)_2[\text{W}^{\text{IV}}\text{O}(\text{SC}_6\text{F}_5)_4]$  in DMF.

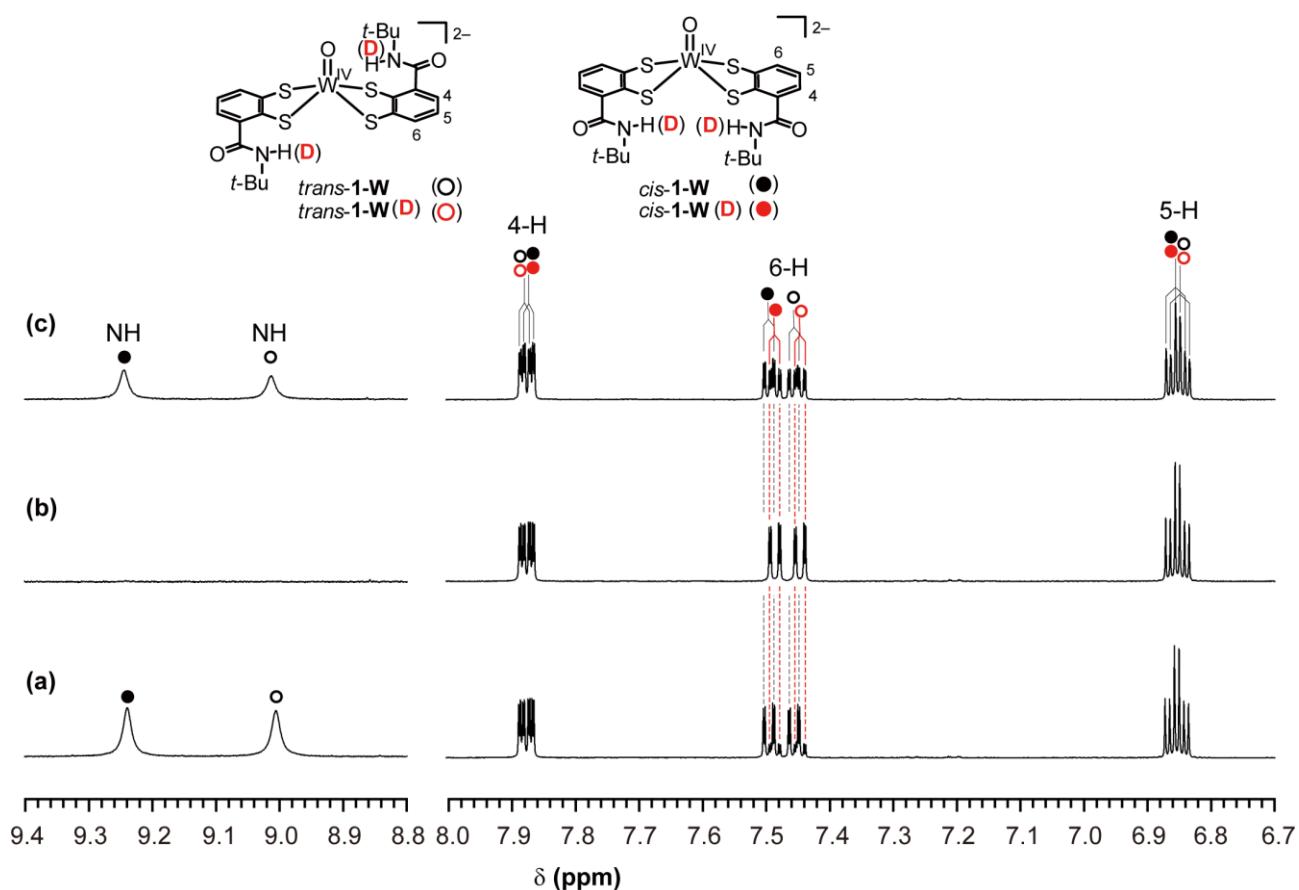

**Fig. S6**  $^1\text{H}$  NMR spectra (measured at  $30\text{ }^\circ\text{C}$ ) of (a)  $(\text{NE}_4)_2[\text{W}^{\text{IV}}\text{O}(1,2\text{-S}_2\text{-3-}t\text{-BuNHCOC}_6\text{H}_3)_2]$  (**1-W**, *trans/cis* = 1:1) containing a minute amount of  $\text{NE}_4\text{BH}_4$  in acetonitrile- $d_3$ , (b) after heating at  $50\text{ }^\circ\text{C}$  for 30 min., and (c) after addition of a trace amount of  $\text{H}_2\text{O}$ . The content of  $(\text{NE}_4)_2[\text{W}^{\text{IV}}\text{O}(1,2\text{-S}_2\text{-3-}t\text{-BuNDCOC}_6\text{H}_3)_2]$  (**1-W(ND)**) was increased from (a) 22% to (b) 93%, and then back to about 50% by the addition of  $\text{H}_2\text{O}$ . The 4-H and 5-H signals of **1-W** and **1-W(ND)** were found at identical chemical shifts for each isomer.

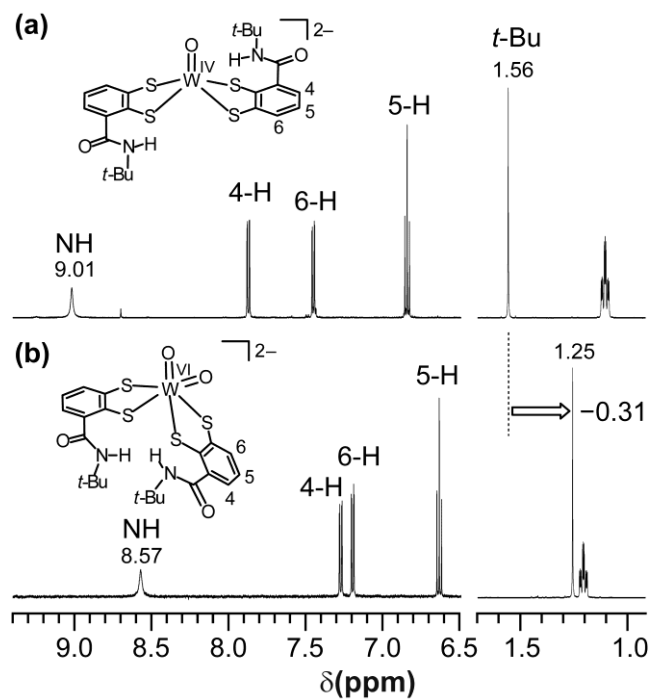

**Fig. S7**  $^1\text{H}$  NMR spectra of (a)  $(\text{NEt}_4)_2[\text{W}^{\text{IV}}\text{O}(1,2\text{-S}_2\text{-3-}t\text{-BuNHCOC}_6\text{H}_3)_2]$  (**1-W**) and (b)  $(\text{NEt}_4)_2[\text{W}^{\text{VI}}\text{O}_2(1,2\text{-S}_2\text{-3-}t\text{-BuNHCOC}_6\text{H}_3)_2]$  (**2-W**) in acetonitrile- $d_3$  at 30 °C. The aromatic region was enlarged along vertical axis.

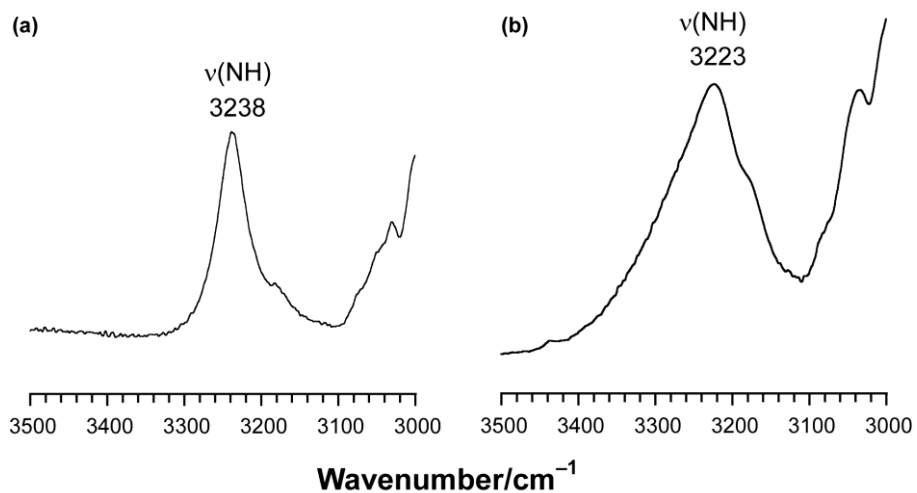

**Fig. S8** IR spectra of (a)  $(\text{NEt}_4)_2[\text{W}^{\text{IV}}\text{O}(1,2\text{-S}_2\text{-3-}t\text{-BuNHCOC}_6\text{H}_3)_2]$  (**1-W**) and (b)  $(\text{NEt}_4)_2[\text{W}^{\text{VI}}\text{O}_2(1,2\text{-S}_2\text{-3-}t\text{-BuNHCOC}_6\text{H}_3)_2]$  (**2-W**) in the solid state.



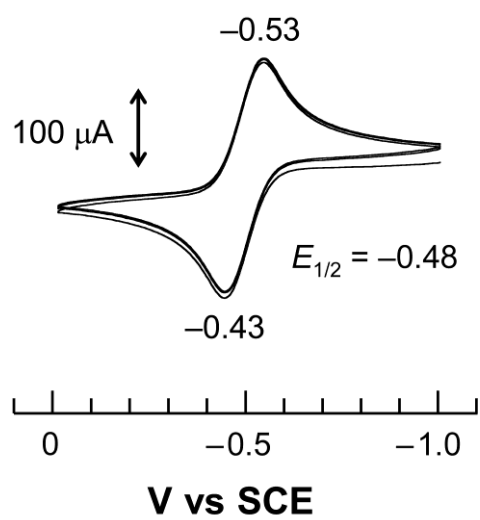

**Fig. S9** Cyclic voltammogram of  $(\text{NEt}_4)_2[\text{W}^{\text{IV}}\text{O}(\text{1,2-S}_2\text{-3-}t\text{-BuNHCOC}_6\text{H}_3)_2]$  (**1-W**) in DMF.
